# Supplementary material
Source: PubMed Central journal article supplement (PMC4059406)
Supplement: NIHMS535216-supplement.pdf [file NIHMS535216-supplement.pdf]

## **Supplementary Information for**

### **Fate tracing reveals hepatic stellate cells as dominant contributors to liver fibrosis independent of its etiology**

Ingmar Mederacke, Christine C. Hsu, Juliane S. Troeger, Peter Huebener, Xueru Mu, Dianne H.

Dapito, Jean-Philippe Pradere, Robert F. Schwabe\*

\* Corresponding author. E-mail: [rfs2102@cumc.columbia.edu](mailto:rfs2102@cumc.columbia.edu)

#### **Contents**

Supplementary Figures S1-10

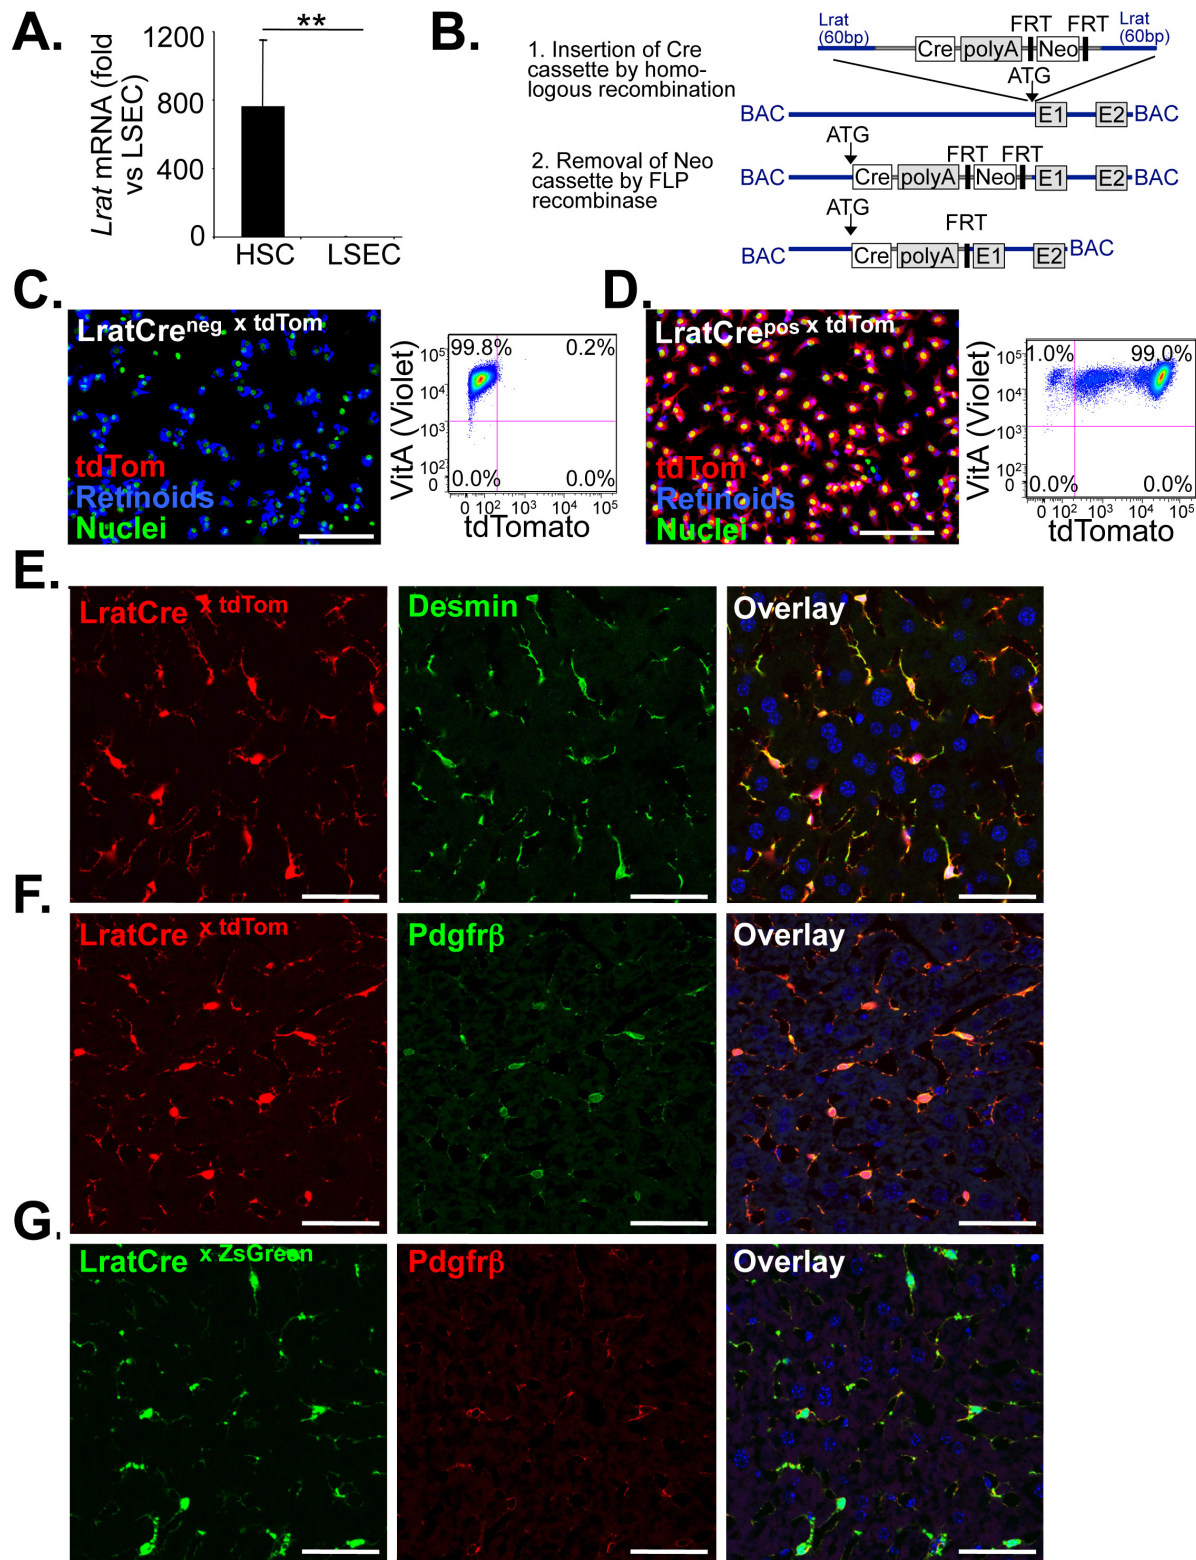

**Supplementary Figure S1. Characterization of LratCre-mediated recombination in the liver.** **A.** Expression of *Lrat* mRNA was compared between primary HSC and primary LSEC, isolated from 18 week old mice, using qPCR (n=3 per group). **B.** Displayed is the LratCre construct employed for generation of BAC-transgenic mice. **C-D.** HSCs were isolated from LratCre negative (C) and LratCre-positive mice (D) expressing tdTomato Cre reporter and either plated for 24h or analyzed by flow cytometry. **E-G.** Colocalization of LratCre-induced tdTomato or ZsGreen with desmin or Pdgfr $\beta$  was determined by immunohistochemical staining and confocal microscopy. Scale bars 100  $\mu$ m (C-D), 50  $\mu$ m (E-G). Data are shown as means  $\pm$  SD. \*\*p<0.01 (determined by Student t-test).

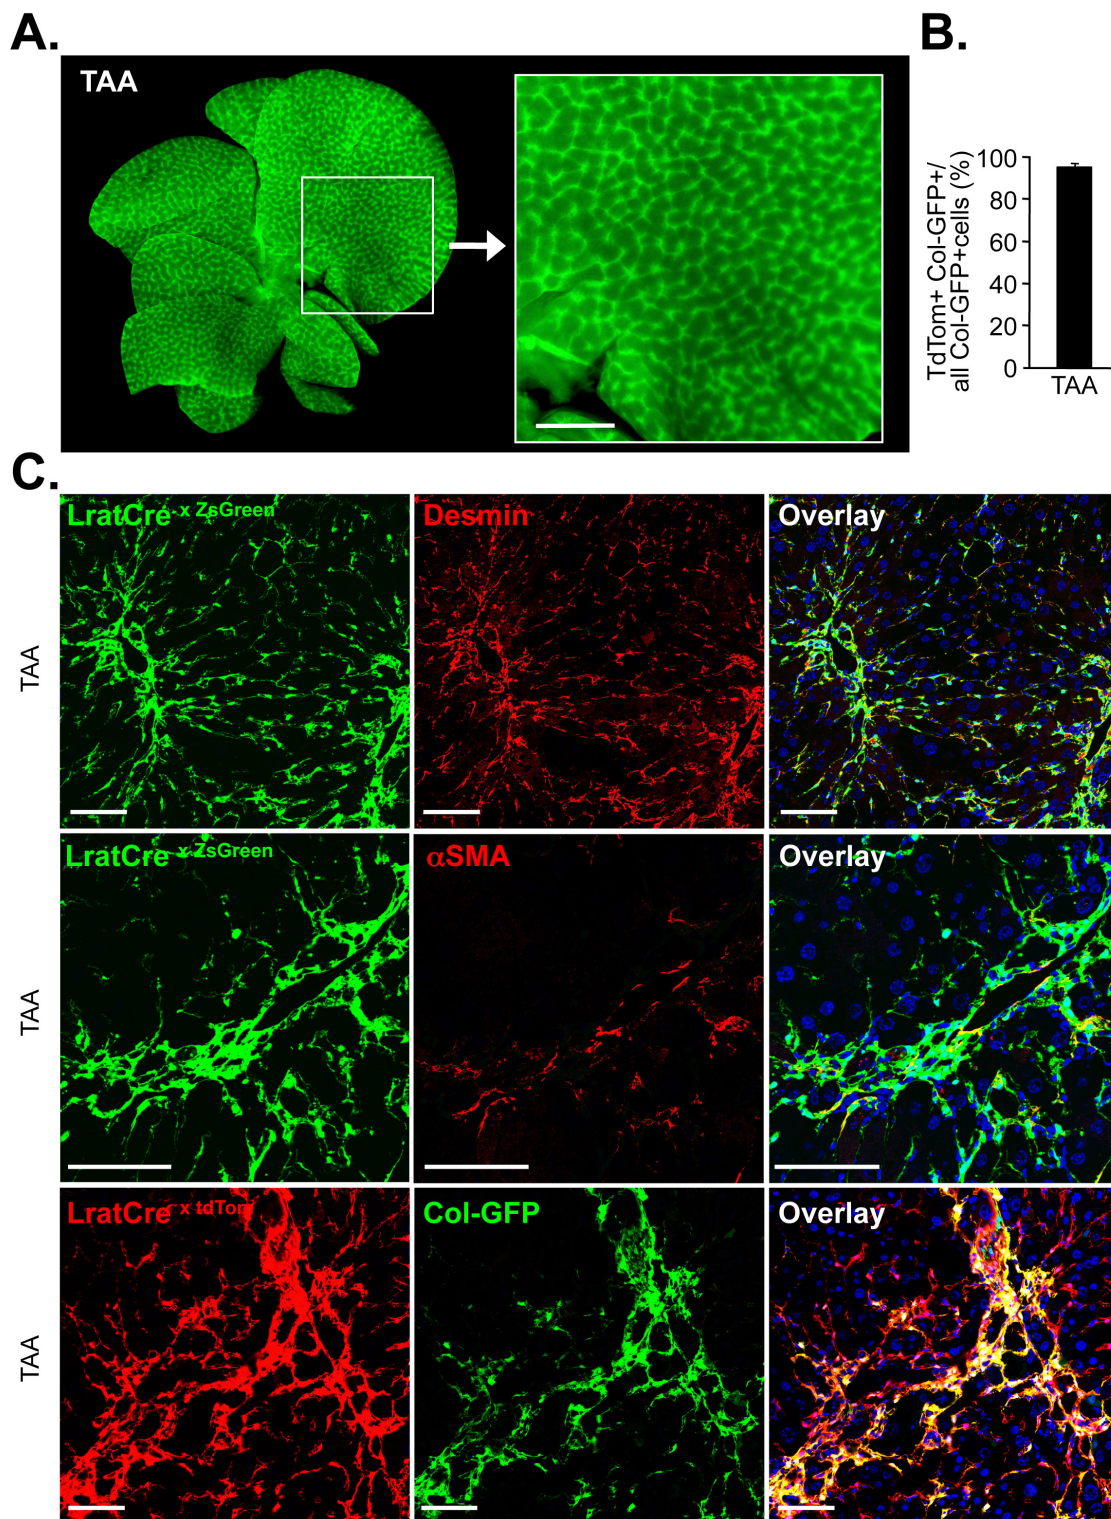

**Supplementary Figure S2. Hepatic stellate cells are the principal source of myofibroblasts in thioacetamide-induced liver fibrosis.** **A.** Representative fluorescent images of whole livers from six weeks thioacetamide (TAA)-treated (n=4) LratCre-positive mice, expressing ZsGreen Cre reporter, show macroscopic fibrotic septa. **B.** Quantification of Col-GFP-expressing cells that are derived from LratCre-labeled tdTomato-positive HSCs in fibrosis induced by six weeks TAA treatment (n=3). **C.** Frozen liver sections from TAA-treated LratCre-positive mice (n=4) were stained with desmin (upper panel) or  $\alpha$ SMA (middle panel) to demonstrate co-localization of HSC marker desmin or  $\alpha$ SMA and LratCre-induced ZsGreen by confocal microscopy. Confocal microscopy was employed to show co-localization of Col-GFP reporter, marking activated myofibroblasts, and LratCre-induced tdTomato expression (lower panel) after six week TAA treatment (n=3). Scale bars 1 mm (A), 100  $\mu$ m (C). Data are shown as means  $\pm$  SD.

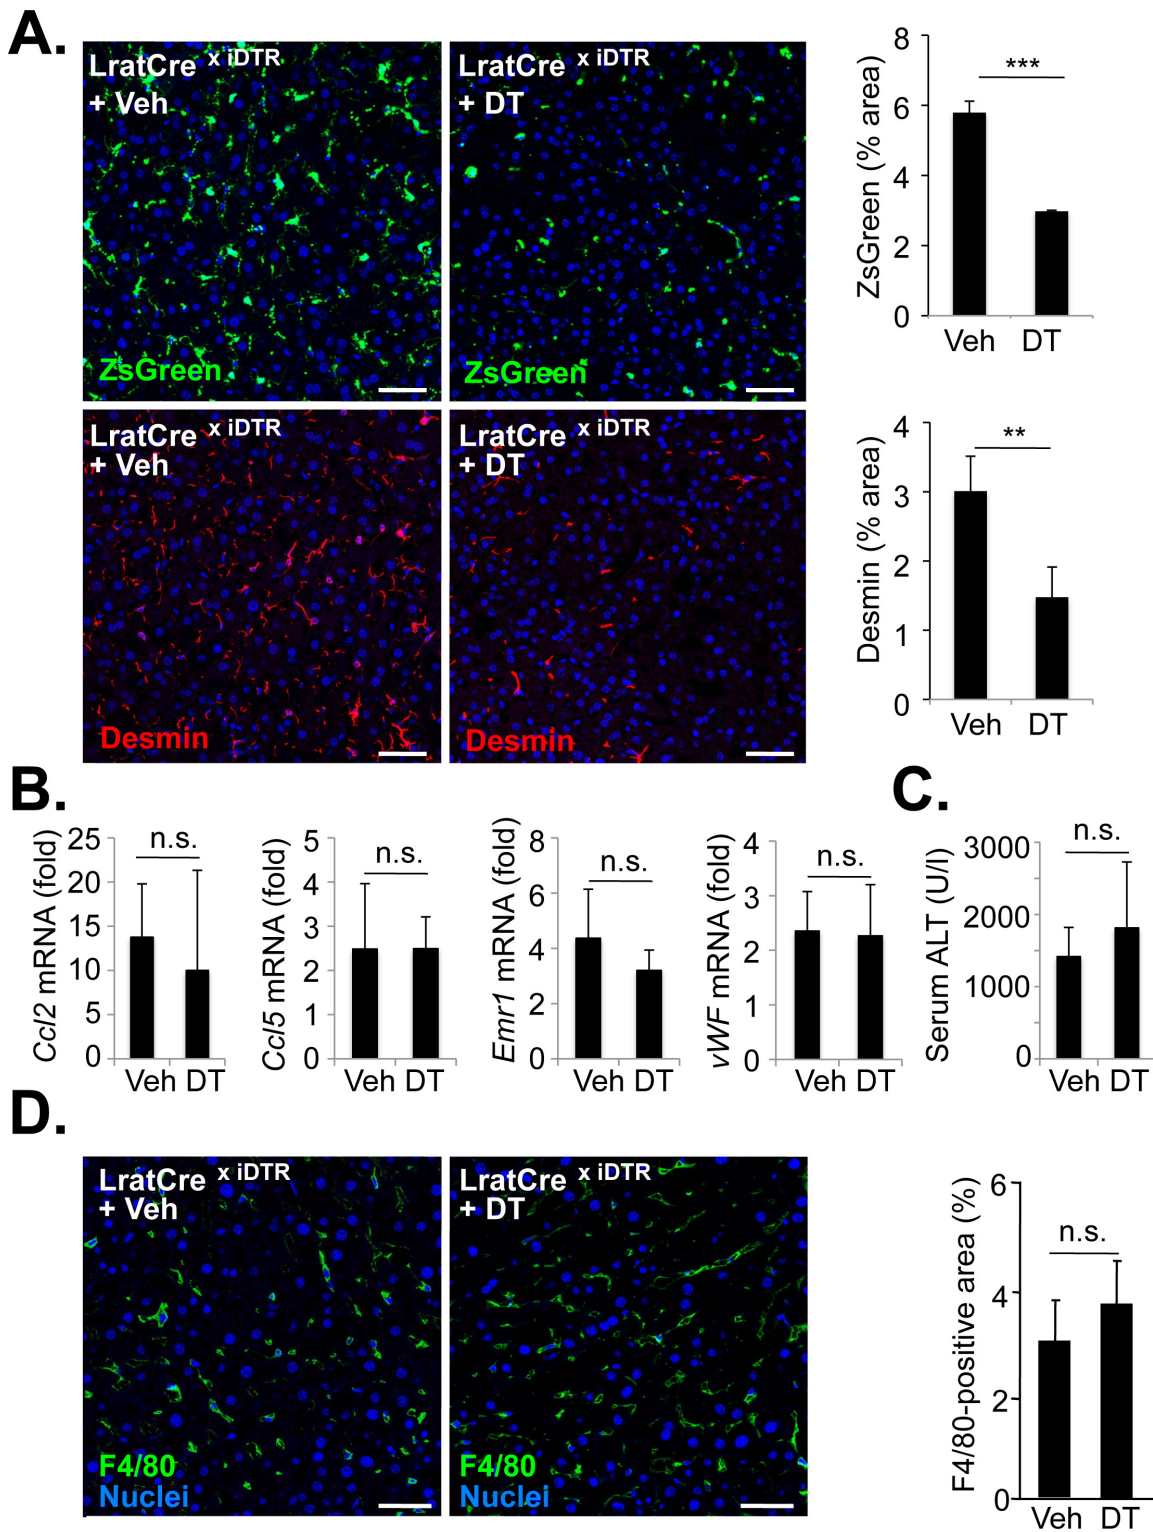

**Supplementary Figure S3. HSC depletion via LratCre-induced iDTR expression.** A. Depletion of HSCs in normal livers was investigated in LratCre-positive mice expressing Cre-inducible diphtheria toxin receptor (iDTR) followed by treatment with diphtheria toxin (DT, n=3) or vehicle (n=4). Depletion of HSCs was assessed by ZsGreen and Desmin expression. **B-D.** LratCre-positive mice expressing Cre-inducible diphtheria toxin receptor (iDTR) were treated with 4 injections of CCl<sub>4</sub> and 4 injection of DT (n=4) or vehicle (n=4). Expression of inflammatory genes and endothelial cell marker *vWf* was determined by qPCR (B). Liver injury was assessed by serum ALT levels (C). The number of F4/80-expressing liver macrophages was determined by immunohistochemistry (D). Scale bars 50  $\mu$ m (A,D). Data are shown as means  $\pm$  SD. n.s., non-significant. \*\*p<0.01, \*\*\*p<0.001 (determined by Student t-test).

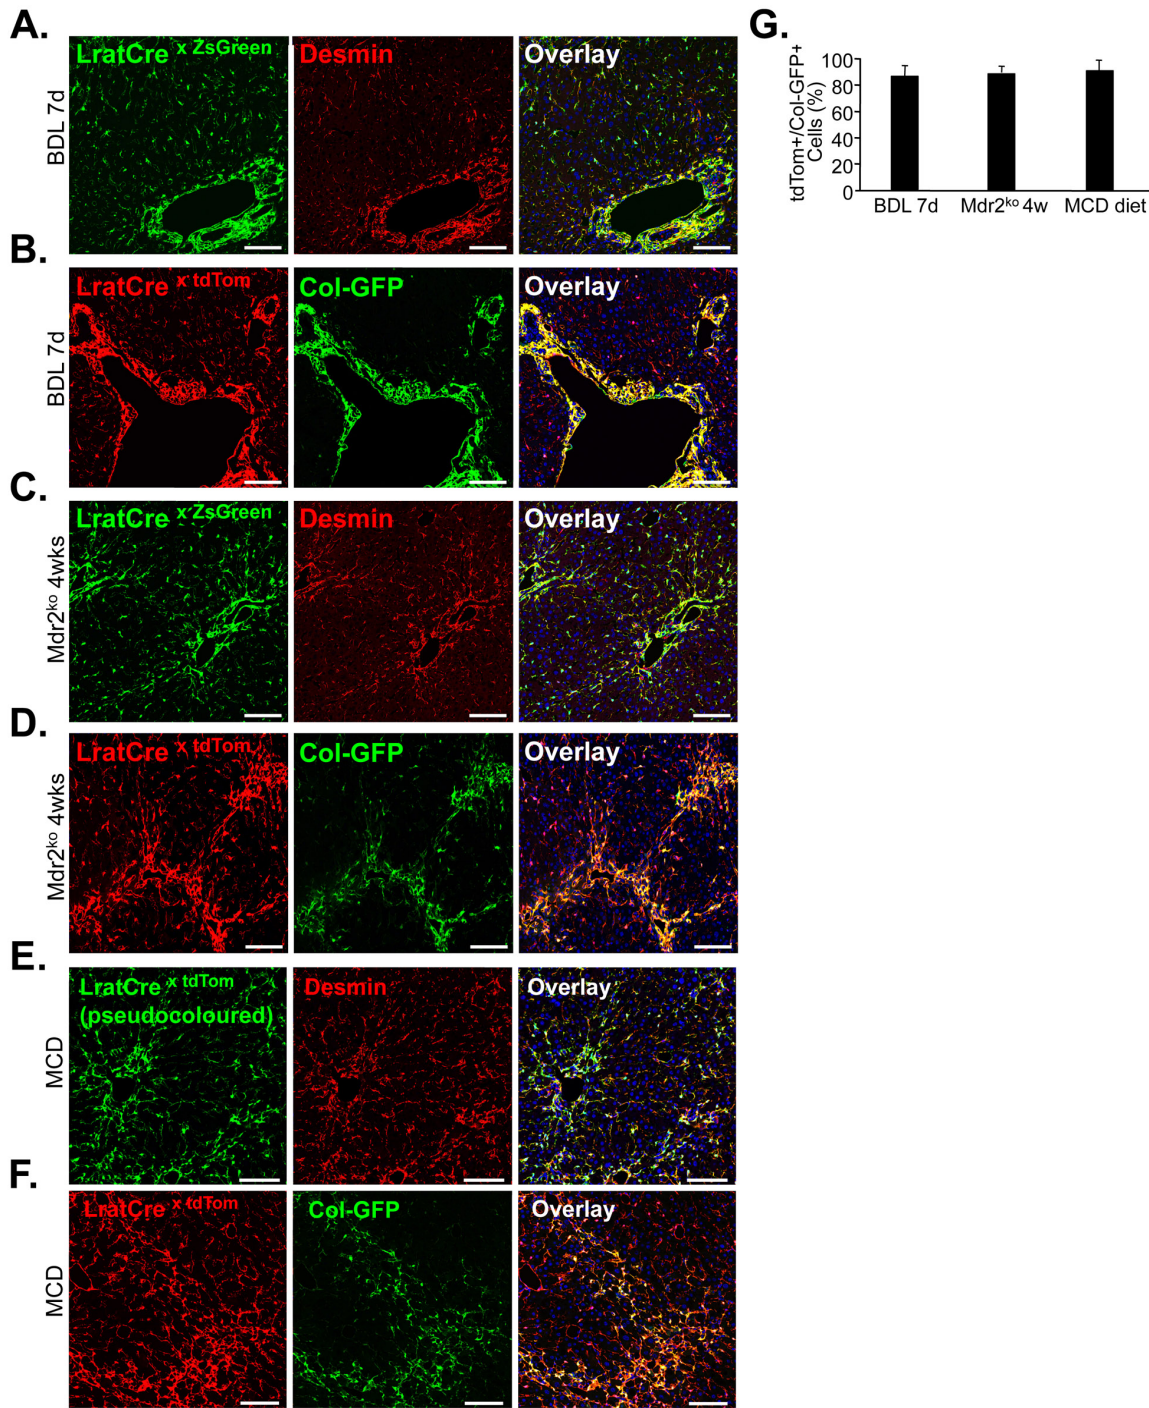

**Supplementary Figure 4. LratCre-marked HSCs are the primary collagen-producing cells in early stages of cholestatic and in non-alcoholic steatohepatitis induced liver fibrosis.** **A.** Mice expressing LratCre and ZsGreen Cre reporter underwent BDL for 7 days (n=1), followed by staining for HSC marker desmin. **B.** Mice expressing LratCre, tdTomato Cre reporter and Col-GFP underwent BDL for 7 days (n=4), and were analyzed by confocal microscopy. **C.** Mdr2ko mice expressing LratCre and ZsGreen were sacrificed at the age of 4 to 6 weeks (n=5) and stained for HSC marker desmin. **D.** Mdr2ko mice expressing LratCre, tdTomato Cre reporter and Col-GFP were analyzed at the age of 4 weeks (n=5) for co-localization of tdTomato and Col-GFP in the liver using confocal microscopy. **E-F.** LratCre mice expressing tdTomato Cre reporter and Col-GFP reporter (n=2) were treated with MCD diet for up to 9 weeks. Co-localization of desmin with tdTomato (E), and co-localization of tdTomato and Col-GFP (F) was demonstrated by confocal microscopy. **G.** Quantification of Col-GFP-expressing cells that are derived from LratCre-labeled tdTomato-positive HSCs after 7 day bile duct ligation (n=4), in 4 week old Mdr2ko mice (n=5) and after MCD diet (n=2). Scale bars 100  $\mu$ m (A-F). Data are shown as means  $\pm$  SD.

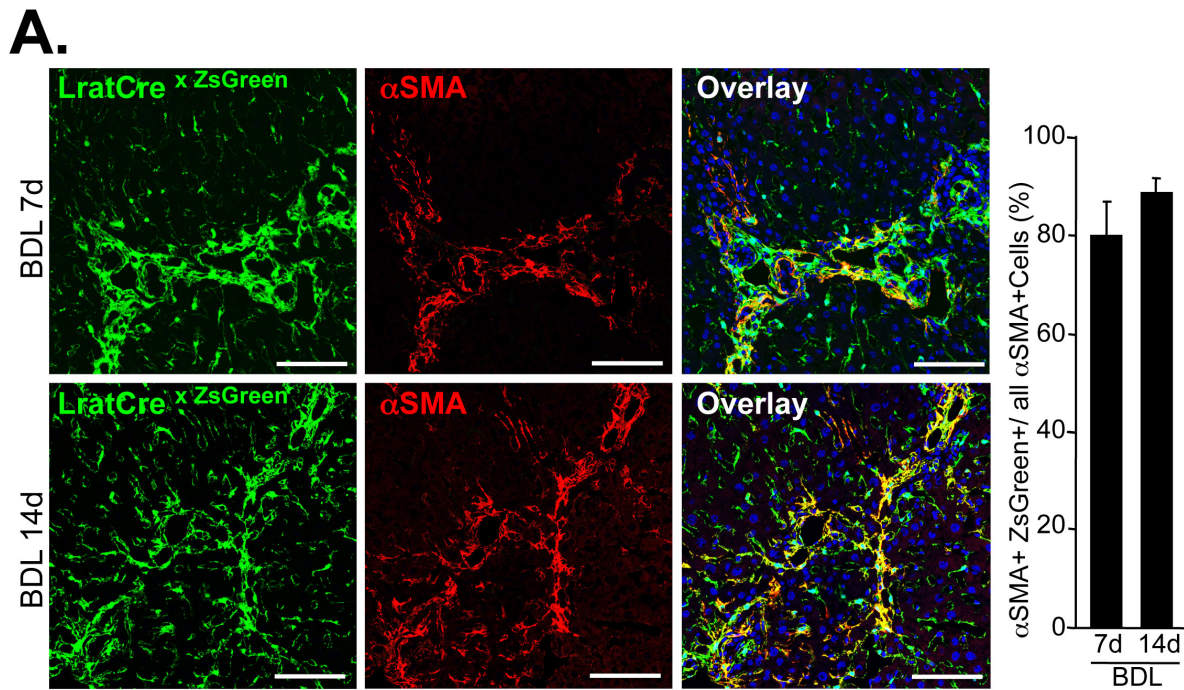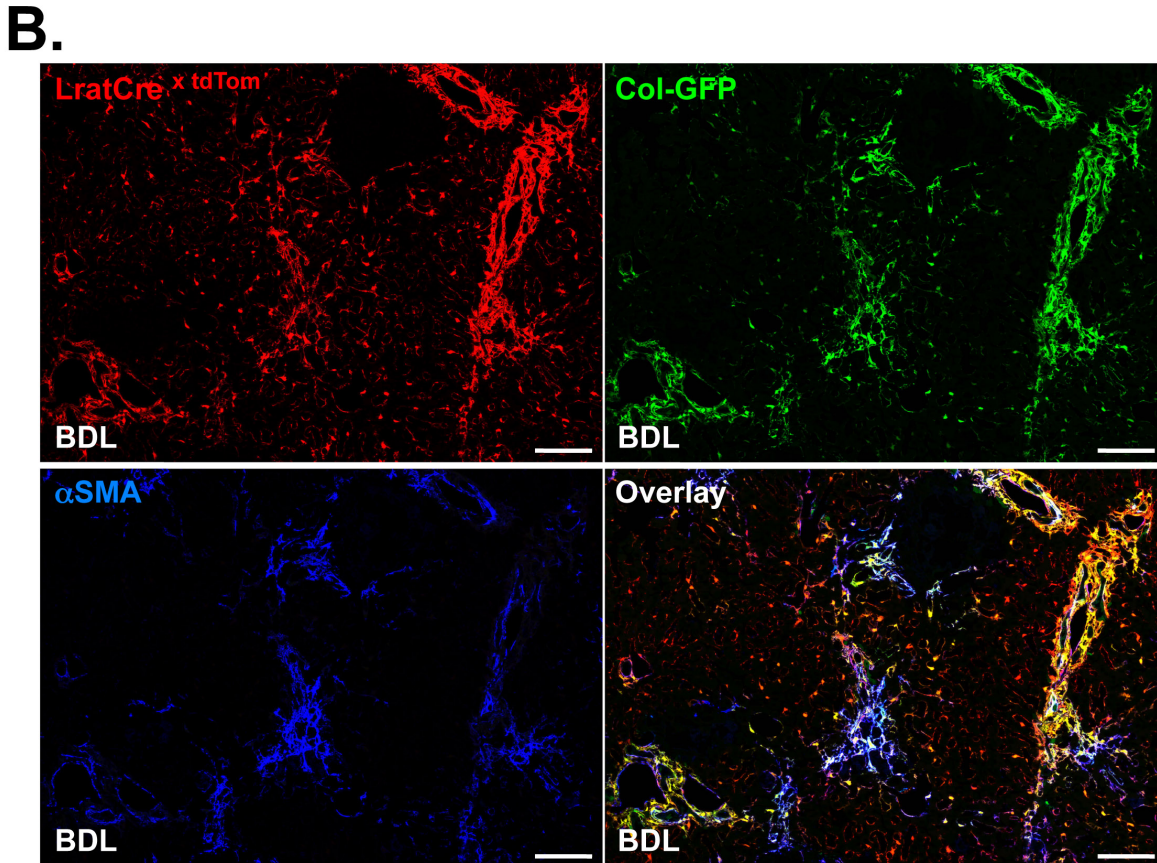

**Supplementary Figure S5. LratCre marks  $\alpha$ SMA-expressing myofibroblasts in liver fibrosis induced by bile duct ligation.** **A.** Liver sections of 7 day bile duct-ligated (n=4) and 14 day bile duct-ligated (n=4) mice expressing LratCre and ZsGreen or tdTomato Cre reporter were stained for  $\alpha$ SMA followed by confocal microscopy, to demonstrate and quantify co-localization of  $\alpha$ SMA with LratCre-induced reporter expression. **B.** Co-localization of  $\alpha$ SMA with tdTomato and Col-GFP in 14 day BDL-induced liver fibrosis was determined by confocal microscopy employing far-red secondary antibody for  $\alpha$ SMA detection. Scale bars 100  $\mu$ m (A-B). Data are shown as means  $\pm$  SD.

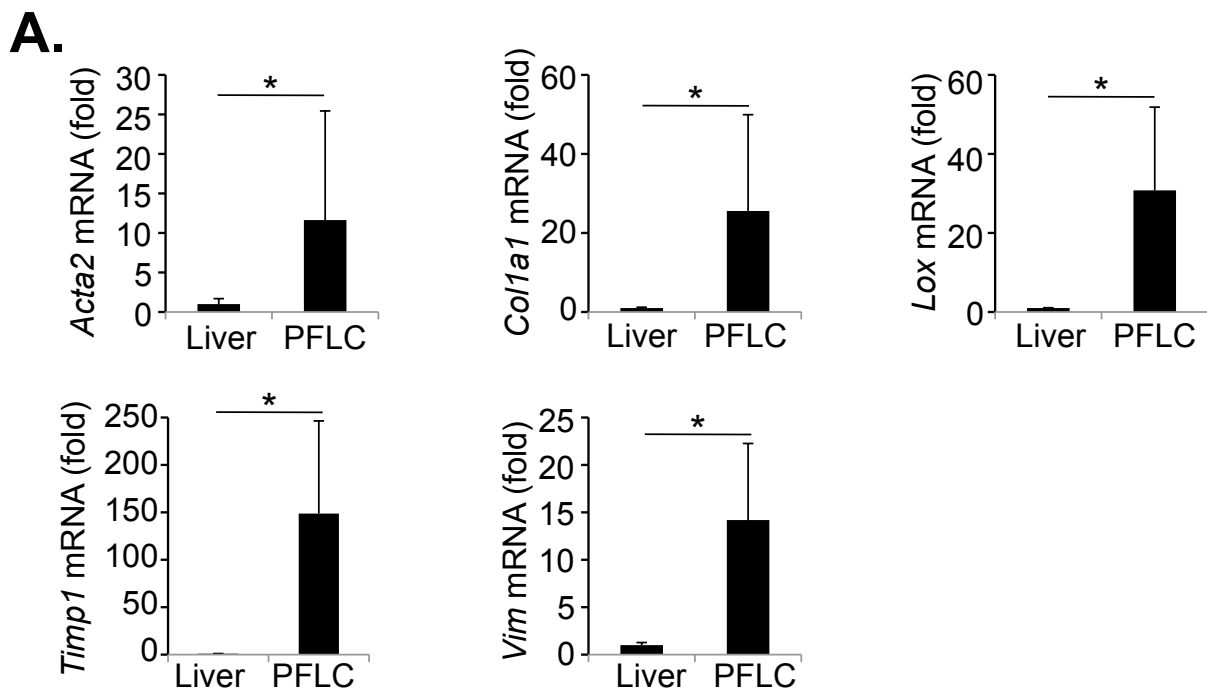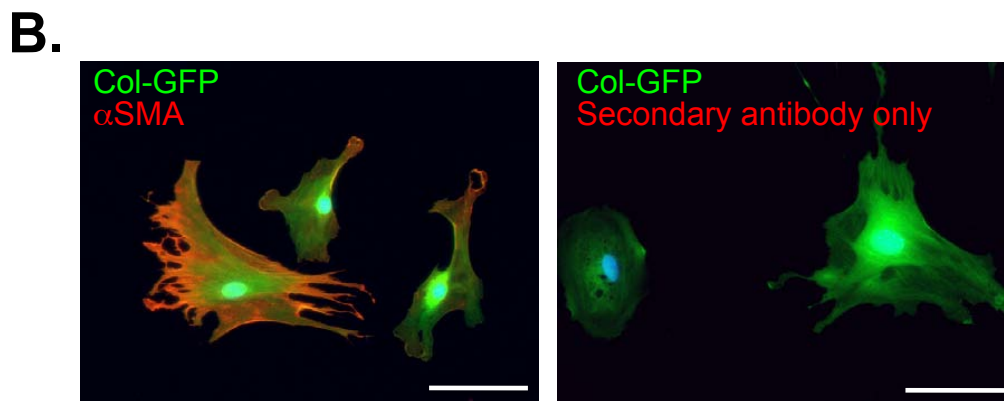

**Supplementary Figure S6. Portal fibroblast-like cells have a gene expression characteristic for fibroblasts.**  
**A-B.** Col-GFP-positive, tdTomato negative portal fibroblast-like cells (PFLC) were isolated by FACS as described. Gene expression of PFLC (n=5) was compared to whole liver (n=4) (A).  $\alpha$ SMA expression was determined by immunofluorescent staining in PFLC cultured for 6 days. Staining without primary antibody confirmed specificity of the  $\alpha$ SMA signal. Scale bar 50  $\mu$ m. Data are shown as means  $\pm$  SD. \* $p$ <0.05 (determined by Student t-test).

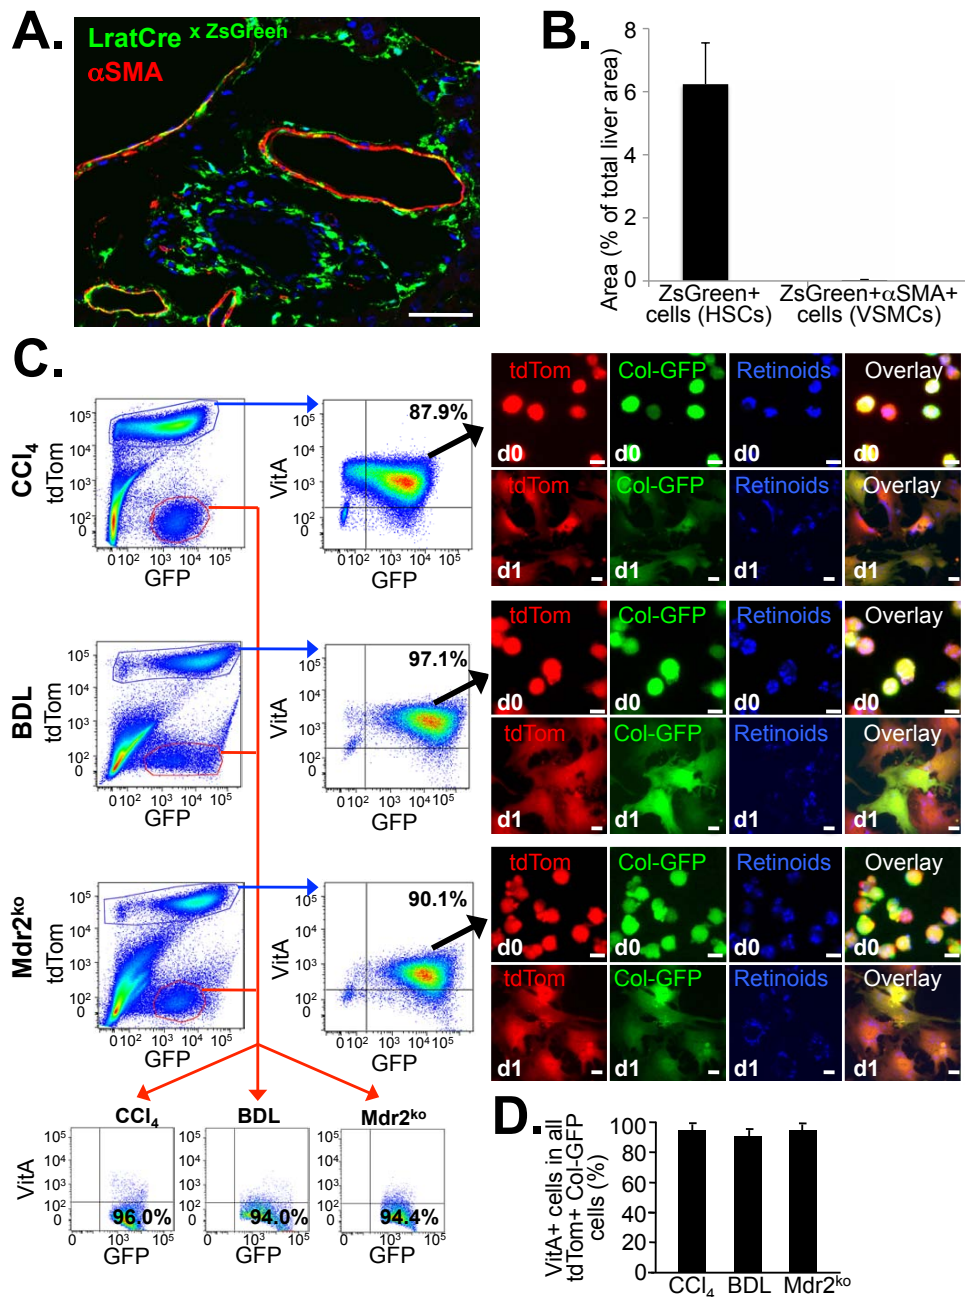

**Supplementary Figure S7. Retinoid-positive LratCre-labeled HSCs are the primary collagen-producing cells in liver fibrosis.** A-B.  $\alpha$ SMA staining was employed to identify VSMCs, some of which are labeled by LratCre-induced ZsGreen (A). The number of ZsGreen-positive HSCs and ZsGreen-and  $\alpha$ SMA-double positive VSMCs was determined by confocal microscopy of normal liver from LratCre-positive ZsGreen expressing livers (n=5) stained with  $\alpha$ SMA, and quantified as percent area. C. Vitamin A fluorescence was employed to determine whether Col-GFP, tdTomato-double positive cells from CCl<sub>4</sub>-treated, BDL and Mdr2<sup>ko</sup> mice were of HSC origin. Using flow cytometry, Col-GFP, tdTomato-double positive cells were gated (blue gates), followed by determination of vitamin A fluorescence in this cell populations (blue arrow). Sorted cells were additionally plated and analyzed by fluorescent microscopy to demonstrate presence of tdTom, Col-GFP and retinoids in each cell. Shown are freshly plated cells (“d0”) and cells after 24h of culture (“d1”) showing typical HSC morphology. To confirm the set vitamin A threshold in the FACS analysis, the Col-GFP positive, tdTomato-negative non-HSC population was gated (red gates) and analyzed for vitamin A fluorescence at the same settings (red arrows). D. The percentage of vitamin A containing HSCs among all Col-GFP, tdTomato-positive myofibroblasts was determined based on above flow cytometric analysis, and calculated for CCl<sub>4</sub>-treated mice (n=5 isolations), BDL mice (n=4 isolations) and Mdr2<sup>ko</sup> mice (n=6 isolations). Scale bar 50  $\mu$ m (A), 10  $\mu$ m (C). Data are shown as means  $\pm$  SD.



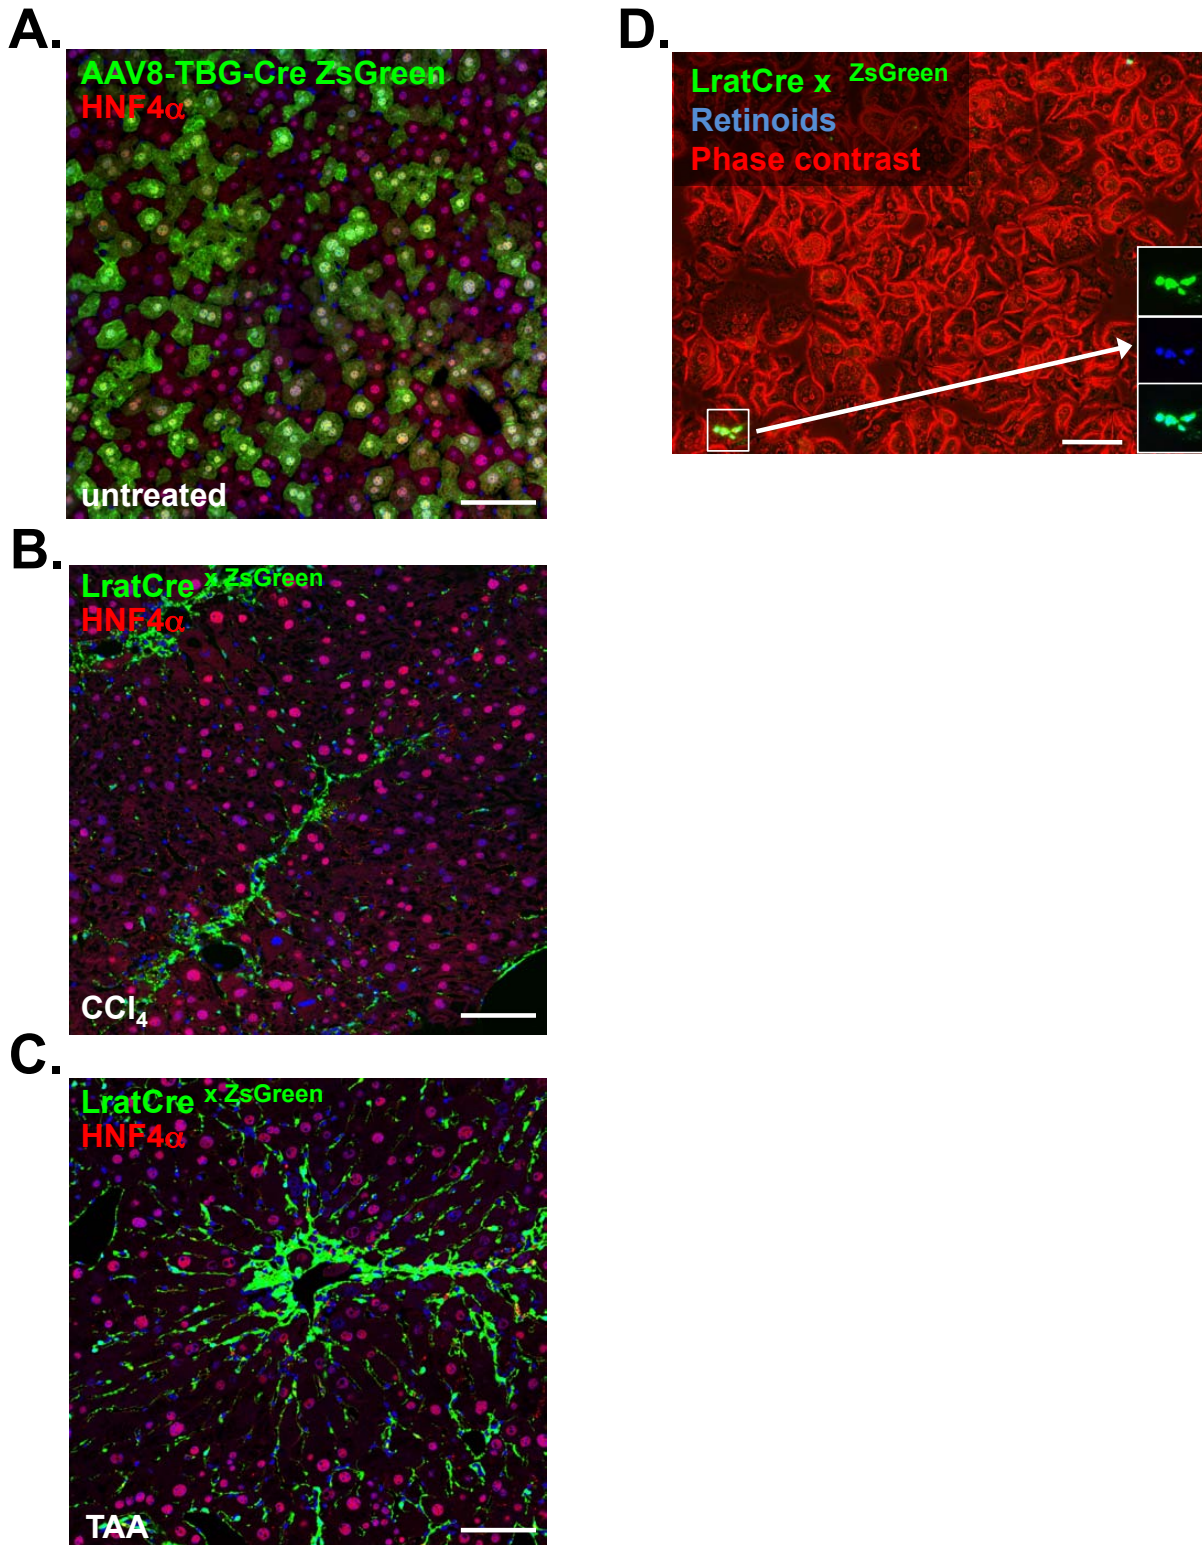

**Supplementary Figure S8. LratCre-labeled HSCs do not contribute to hepatocyte generation in the CCl<sub>4</sub>, TAA or DDC models of liver injury.** **A.** As a positive control for ZsGreen-positive hepatocytes, mice were injected with low-dose AAV8-TBG-Cre and sacrificed one week later (n=1), followed by HNF4 $\alpha$  immunohistochemistry and confocal microscopy. **B-C.** Liver sections from CCl<sub>4</sub>-treated mice (n=4) (B) and TAA-treated mice (n=4) (C) expressing LratCre and ZsGreen Cre reporter were stained for HNF4 $\alpha$  and analyzed by confocal microscopy. **D.** Image of primary hepatocytes from mice that received DDC diet for four weeks (n=1), followed by three weeks recovery, showing no ZsGreen-positive hepatocytes, and rare ZsGreen-positive HSCs, identified by their characteristic fluorescent retinoid-containing lipid droplets. Scale bars 100  $\mu$ m.

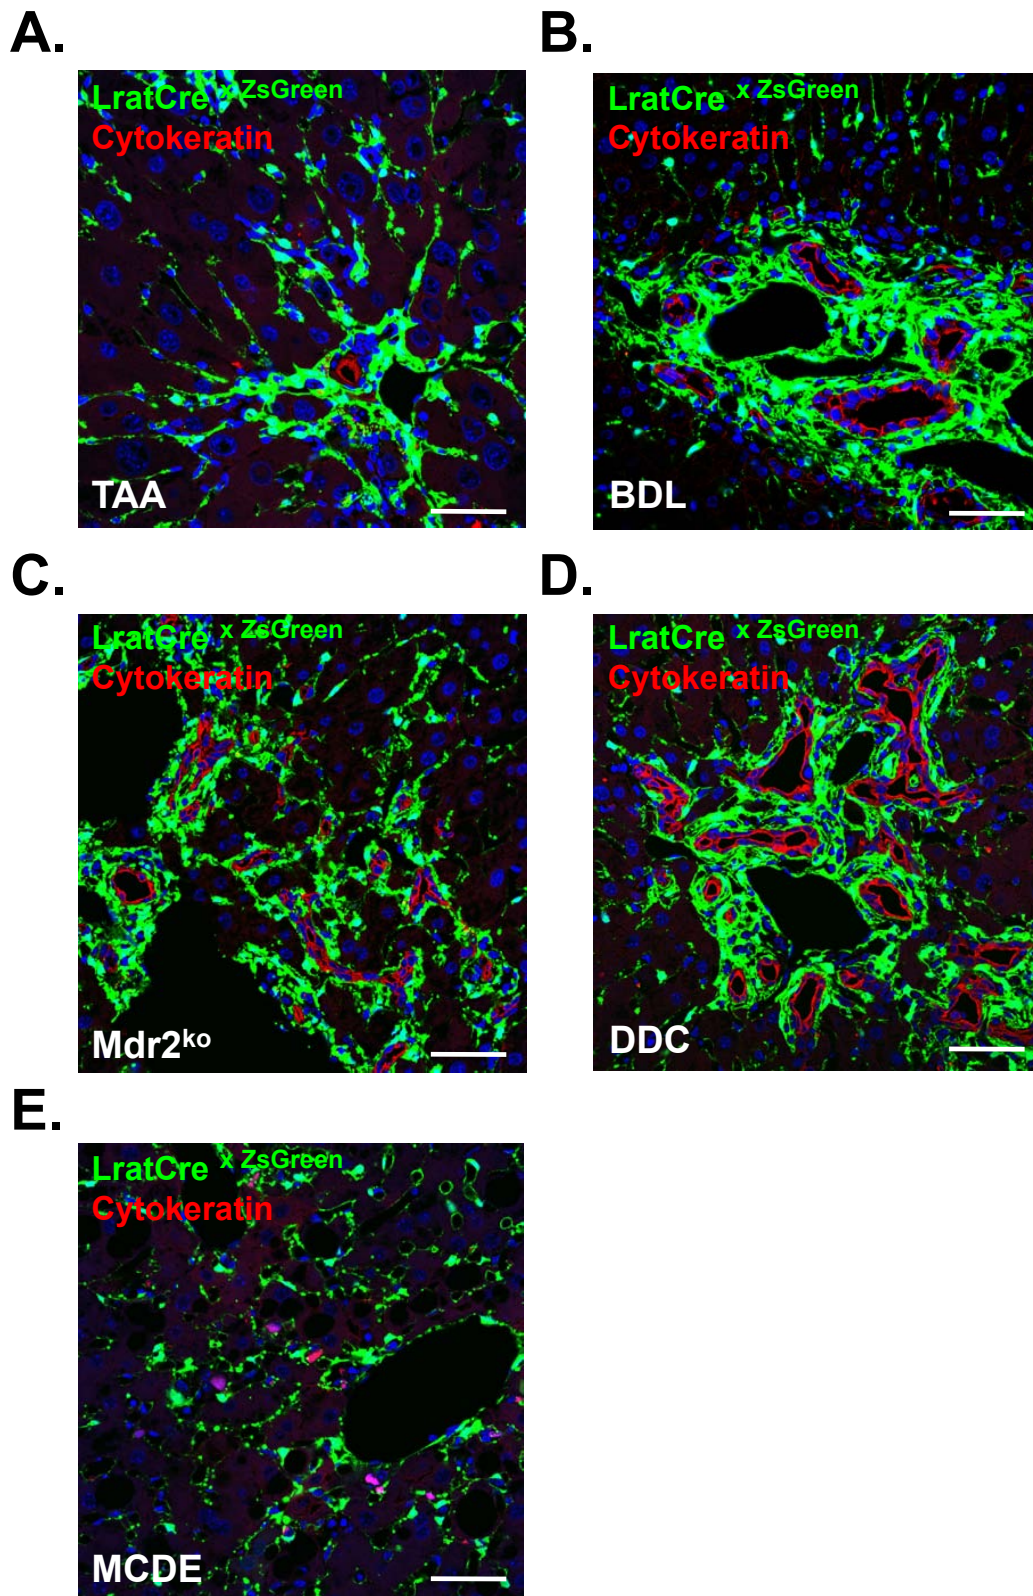

**Supplementary Figure S9. LratCre-labeled HSCs are not precursors of liver progenitor cells.** Liver sections of TAA-treated (n=4) (A), 14 day bile duct-ligated (n=3) (B), Mdr2ko mice (n=4) (C), DDC-treated (n=3) (D) and MCDE-treated mice (n=4) (E) all expressing LratCre and ZsGreen Cre reporter, were stained for cytokeratin. Confocal microscopy revealed no co-localization of the liver progenitor marker cytokeratin with LratCre-induced ZsGreen expression. Scale bars 50  $\mu$ m.

**A.**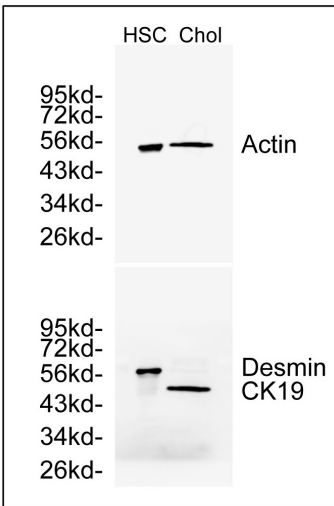**B.**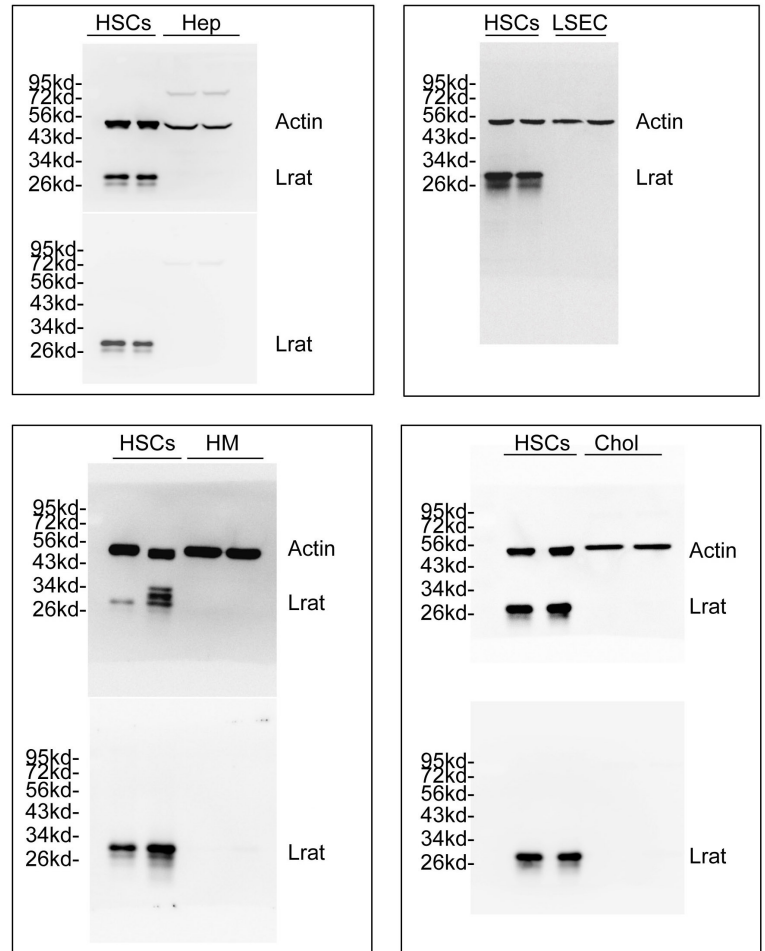**C.**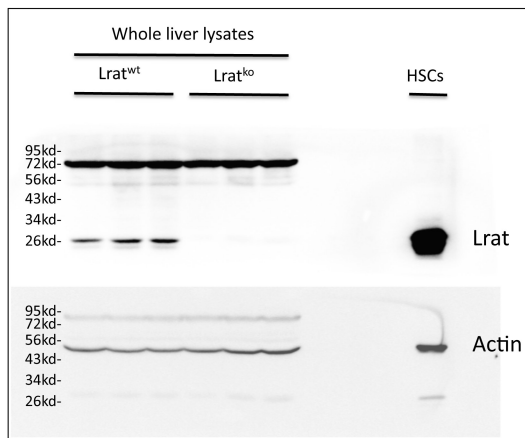

**Supplementary Figure S10. A-B.** Full size Western Blot for Figures 1F (A) and Figure 2A (B). **C.** Specificity of the Lrat antibody was determined using liver extracts from 3 wild-type and 3 Lrat knockout mice. Hepatic stellate cell extracts were used as additional positive control.
